# Supplementary material for: Molecular Mechanisms of Nemorosone-Induced Ferroptosis in Cancer Cells
Source: MDPI journal article supplement (doi:10.3390/cells12050735), 2023-02-24
Supplement: s1 [file s1]

*Supplementary Materials*

# Molecular Mechanisms of Nemorosone-induced Ferroptosis in Cancer Cells

Roberto Fernández-Acosta <sup>1</sup>, Behrouz Hassannia <sup>2,3,4</sup>, Jurgen Caroen <sup>5</sup>, Bartosz Wiernicki <sup>2,3</sup>,  
Daniel Alvarez-Alminaque <sup>6</sup>, Bruno Verstraeten <sup>2,3</sup>, Johan Van der Eycken <sup>5</sup>, Peter Vandenabeele <sup>2,3,7</sup>,  
Tom Vanden Berghe <sup>2,3,4</sup> and Gilberto L. Pardo-Andreu <sup>6,\*</sup>

<sup>1</sup> Department of Pharmacy, Institute of Pharmacy and Food, University of Havana, 222 St. # 2317, La Coronela, La Lisa, Havana 13600, Cuba

<sup>2</sup> Cell Death and Inflammation Unit, VIB Center for Inflammation Research (IRC), 9052 Ghent, Belgium

<sup>3</sup> Department of Biomedical Molecular Biology (DBMB), Ghent University, 9052 Ghent, Belgium

<sup>4</sup> Laboratory of Pathophysiology, Department of Biomedical Sciences, University of Antwerp, 2000 Antwerp, Belgium

<sup>5</sup> Laboratory for Organic and Bio-Organic Synthesis, Department of Organic and Macromolecular Chemistry, Ghent University, 9000 Ghent, Belgium

<sup>6</sup> Center for Research and Biological Evaluations, Institute of Pharmacy and Food, University of Havana, 222 St. # 2317, La Coronela, La Lisa, Havana 13600, Cuba

<sup>7</sup> Methusalem Program, Ghent University, 9052 Ghent, Belgium

\* Correspondence: gpardo@ifal.uh.cu

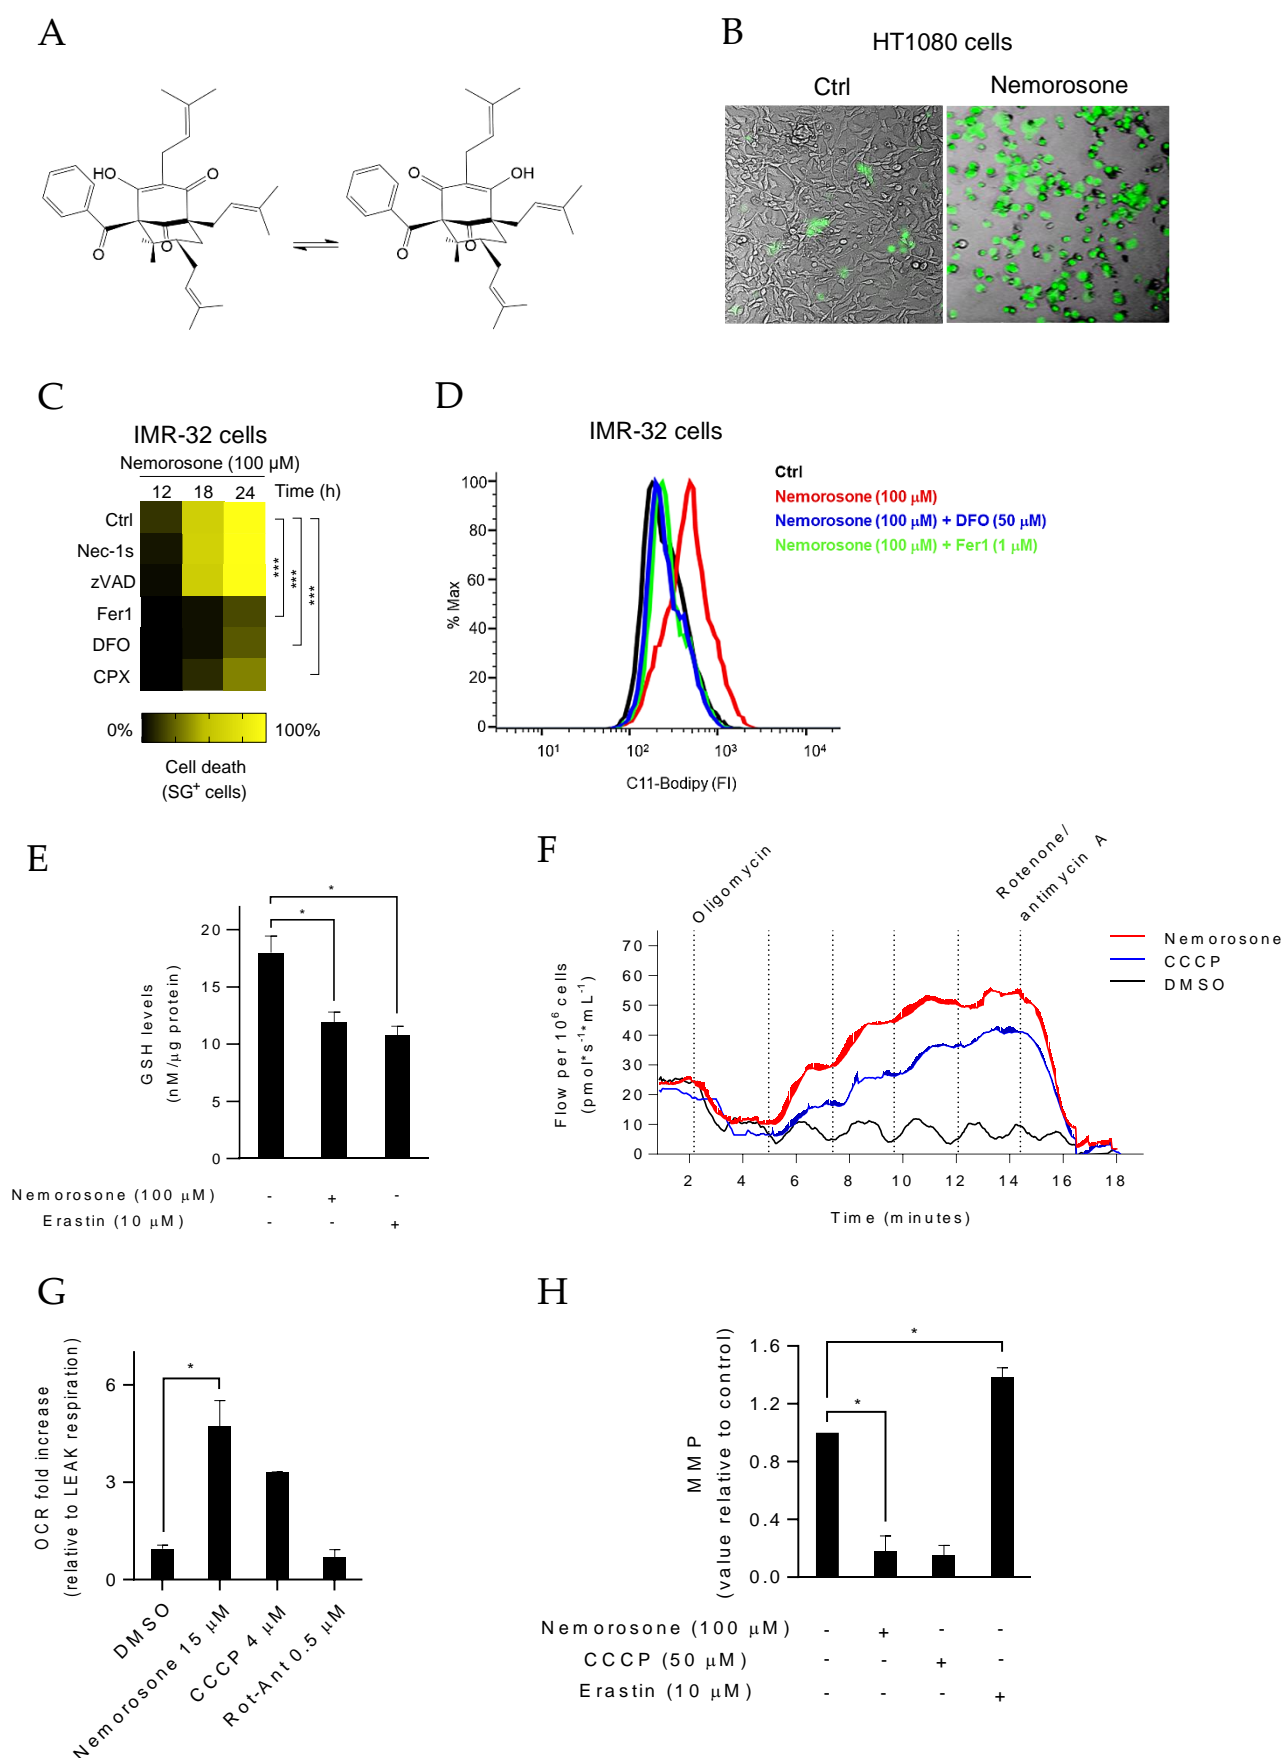

**Figure S1.** Nemorosone induces ferroptosis and mitochondrial uncoupling in neuroblastoma cells. (A) Nemorosone's structure (mixture of tautomers): left: (1S,5R,7R)-5-benzoyl-4-hydroxy-6,6-

dimethyl-1,3,7-tris(3-methylbut-2-en-1-yl)bicyclo[3.3.1]non-3-ene-2,9-dione; right: (1S,5S,7R)-1-benzoyl-4-hydroxy-8,8-dimethyl-3,5,7-tris(3-methylbut-2-en-1-yl)bicyclo[3.3.1]non-3-ene-2,9-dione. (B) Snapshots from live cell imaging of untreated (Ctrl) and nemorosone-treated HT1080 cells (12 h, 100  $\mu$ M). Green fluorescent staining represents SytoxGreen dye. (C) Heatmap representing cell death sensitivity of neuroblastoma (IMR-32) cells after exposure to 100  $\mu$ M of nemorosone, in the absence or presence of different inhibitors: the necroptosis inhibitor: necrostatin-1 (Nec-1s, 10  $\mu$ M), the pan-caspase inhibitor Z-VAD-FMK (10  $\mu$ M), and the ferroptosis inhibitors ferrostatin-1 (Fer1, 1  $\mu$ M), deferoxamine (DFO, 50  $\mu$ M), and ciclopirox olamine (CPX, 5  $\mu$ M). (D) Flow cytometry analysis (histogram) of the lipid peroxidation sensor (C11-BODIPY-581/591 dye) on live-gated IMR-32 cells (DRAQ7-negative cells) after treatment with nemorosone (2 h, 100  $\mu$ M) and its combination with the ferroptosis inhibitors DFO (50  $\mu$ M) and Fer1 (1  $\mu$ M). FI is the fluorescent intensity. Traces are representative of two independent experiments. (E) GSH levels in IMR-32 cells after treatment with nemorosone (2 h, 100  $\mu$ M) or erastin (4 h, 10  $\mu$ M). (F) Phosphorylation control protocol performed by high-resolution respirometry in intact IMR-32 cells. After the addition of oligomycin (1.5  $\mu$ M), cells were titrated with nemorosone and CCCP in steps of 5  $\mu$ M and 1  $\mu$ M additions respectively, totalizing final concentrations of 20  $\mu$ M (nemorosone) and 4  $\mu$ M (CCCP) in the Oxygraph-2k chambers (2 mL). DMSO was added similar to nemorosone. The  $O_2$  flow ( $\text{pmol}\cdot\text{s}^{-1}\cdot\text{mL}^{-1}$ ) was inhibited to a constant level after the addition of rotenone-antimycin A mix (0.5  $\mu$ M). Every addition is represented by vertical dot lines. (G) Oxygen consumption rate (OCR) fold increase relative to LEAK state (reached after the inhibition of  $F_1F_0$  ATP synthase by oligomycin) in IMR-32 cells exerted by the separated addition of DMSO (15  $\mu$ M), nemorosone (15  $\mu$ M), CCCP (4  $\mu$ M) and rotenone-antimycin A mix (Rot-Ant, 0.5  $\mu$ M). (H) Flow cytometry analysis of the mitochondrial membrane potential sensor (TMRE) on live-gated IMR-32 cells (SytoxBlue-negative cells) after treatment with nemorosone (1 h, 100  $\mu$ M), CCCP (1 h, 50  $\mu$ M), or erastin (3 h, 10  $\mu$ M). Values are expressed as the fold increase of each signal relative to the median fluorescence intensity of the control. The combined results of 2 independent experiments are shown for (C) and (E)–(H). All quantitative data are presented as mean  $\pm$  SD. \* $p < 0.05$ , \*\*\* $p < 0.001$  by unpaired Student's t-test.

A

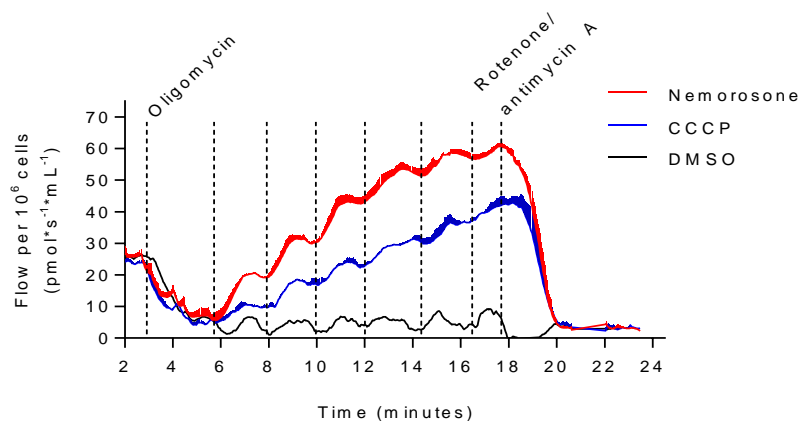

B

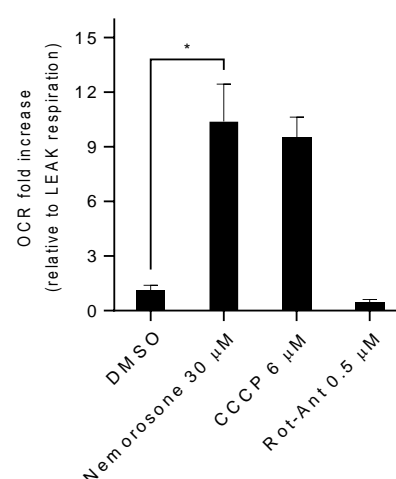

C

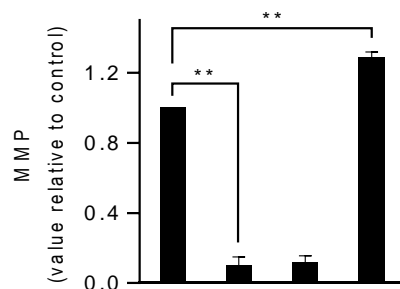

|                          |   |   |   |   |
|--------------------------|---|---|---|---|
| Nemorosone (100 $\mu$ M) | - | + | - | - |
| CCCP (50 $\mu$ M)        | - | - | + | - |
| Erastin (10 $\mu$ M)     | - | - | - | + |

D

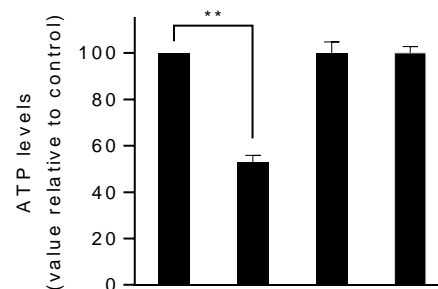

|                          |   |   |   |   |
|--------------------------|---|---|---|---|
| Nemorosone (100 $\mu$ M) | - | + | - | - |
| CCCP (50 $\mu$ M)        | - | - | + | - |
| Oligomycin (1.5 $\mu$ M) | - | - | - | + |

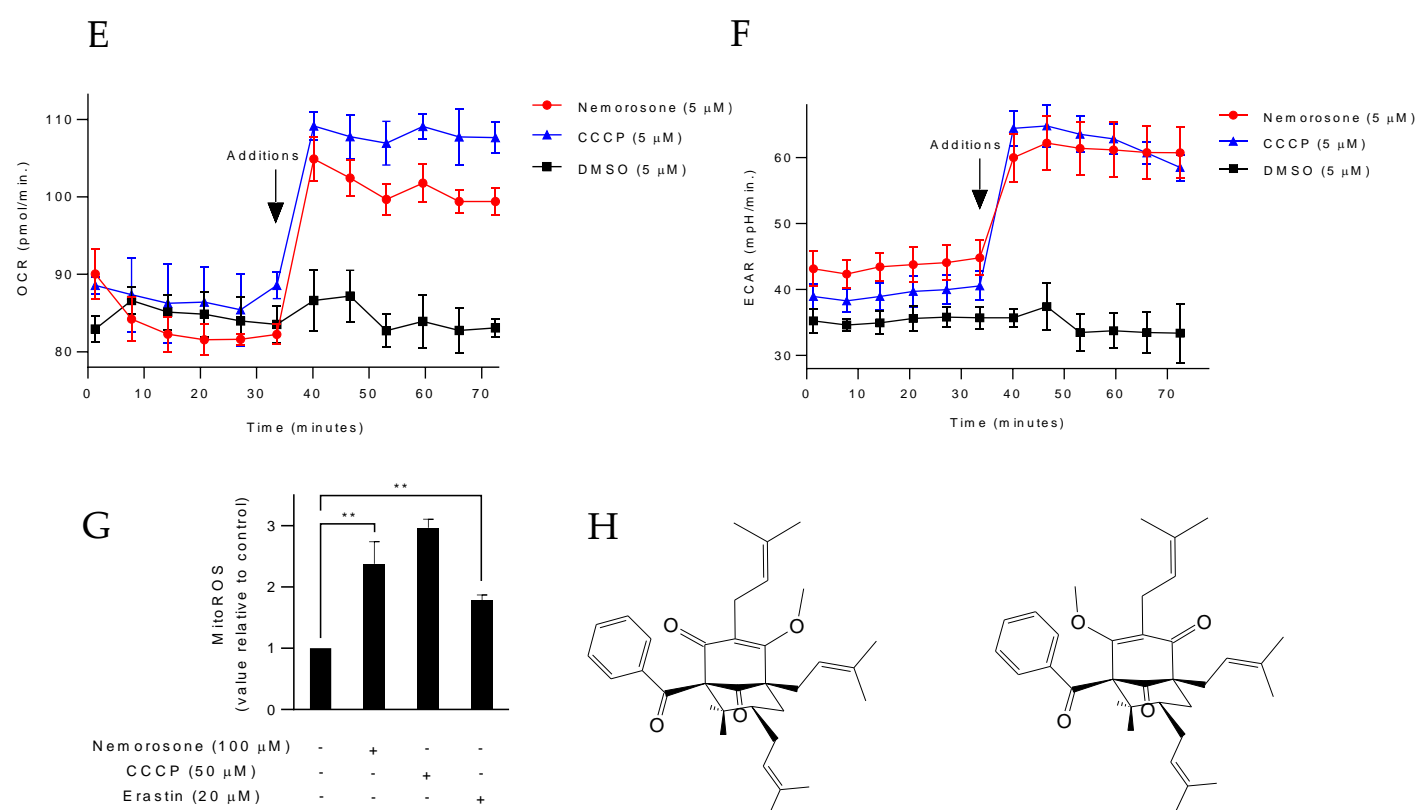

**Figure S2.** Mitochondrial uncoupling triggered by nemorosone in fibrosarcoma cells. **(A)** Phosphorylation control protocol performed by high-resolution respirometry in intact HT1080 cells. Experimental conditions similar to those described in Supplementary Fig. 1f. Nemorosone and CCCP were added in steps of 5  $\mu$ M and 1  $\mu$ M respectively, totalizing final concentrations of 30  $\mu$ M (nemorosone) and 6  $\mu$ M (CCCP). **(B)** Oxygen consumption rate (OCR) fold increase relative to LEAK state (reached after the inhibition of  $F_1F_0$  ATP synthase by oligomycin) in HT1080 cells exerted by the separated addition of DMSO (30  $\mu$ M), nemorosone (30  $\mu$ M), CCCP (6  $\mu$ M) and rotenone-antimycin A mix (Rot-Ant, 0.5  $\mu$ M). **(C)** Flow cytometry analysis of the mitochondrial membrane potential sensor (TMRE) on live-gated HT1080 cells (SytoxBlue-negative cells) after treatment with nemorosone (1 h, 100  $\mu$ M), CCCP (1 h, 50  $\mu$ M), or erastin (3 h, 10  $\mu$ M). Values are expressed as the fold increase of each signal relative to the median fluorescence intensity of the control. **(D)** ATP levels in HT1080 cells after 6 h of treatment in the absence (control) or presence of nemorosone (100  $\mu$ M), CCCP (50  $\mu$ M) or oligomycin (1.5  $\mu$ M). **(E), (F)** OCR and extracellular acidification rate (ECAR), respectively, in HT1080 cells treated with nemorosone (5  $\mu$ M) and CCCP (5  $\mu$ M) as measured using Seahorse XF flux analyzer. Compounds additions are indicated by arrows. OCR and ECAR values are representative rates of  $n = 6-8$  wells/treatment/experiment from one experiment. **(G)** Flow cytometry analysis of the mitochondrial superoxide production (mitoROS) sensor MitoSox Red on live-gated HT1080 cells (SytoxBlue-negative cells) after treatment with nemorosone (2 h, 100  $\mu$ M), CCCP (2 h, 50  $\mu$ M) or erastin (2 h, 20  $\mu$ M). Values are expressed as the fold increase of each signal relative to the median fluorescence intensity of the control. **(H)** Methylnemorosone's structure, a mixture of 2 isomers: left: (1*S*,5*S*,7*R*)-1-benzoyl-4-methoxy-8,8-dimethyl-3,5,7-tris(3-methylbut-2-en-1-yl)bicyclo[3.3.1]non-3-ene-2,9-dione; right: (1*S*,5*R*,7*R*)-5-benzoyl-4-methoxy-6,6-dimethyl-1,3,7-tris(3-methylbut-2-en-1-yl)bicyclo[3.3.1]non-3-ene-2,9-dione. The combined results of 3 independent experiments are shown for **(A)**–**(D)** and **(G)**. All quantitative data are presented as mean  $\pm$  SD. \* $p < 0.05$ , \*\* $p < 0.01$  by unpaired Student's *t*-test.

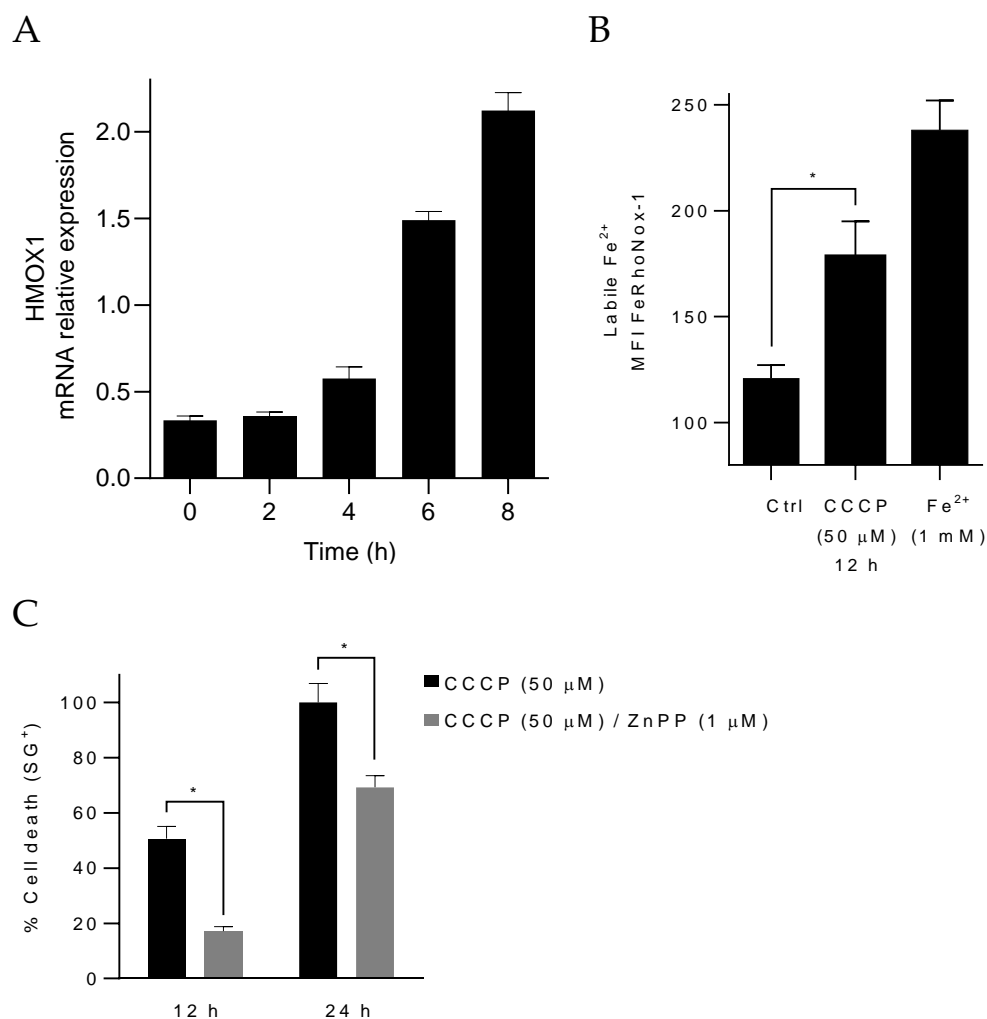

**Figure S3.** CCCP induces HMOX1 expression in HT1080 cells. **(A)** Relative *HMOX1* mRNA expression in HT1080 cells after CCCP (50 μM) treatment at different time points. **(B)** Cellular levels of labile Fe<sup>2+</sup>, determined by flow cytometry by using FeRhNox-1 dye, in response to CCCP (12 h, 50 μM). (MFI is the median fluorescence intensity.) Ferrous ammonium sulfate was used as a control (2 h, 1 mM). **(C)** Percentage of cell death in function of time induced by CCCP (50 μM) in the presence/absence of ZnPP (1 μM), assessed by using SytoxGreen dye. The combined results of 2 independent experiments are shown for **(B)** and **(C)**. All quantitative data are presented as mean ± SD. \*p < 0.05 by unpaired Student's t-test.

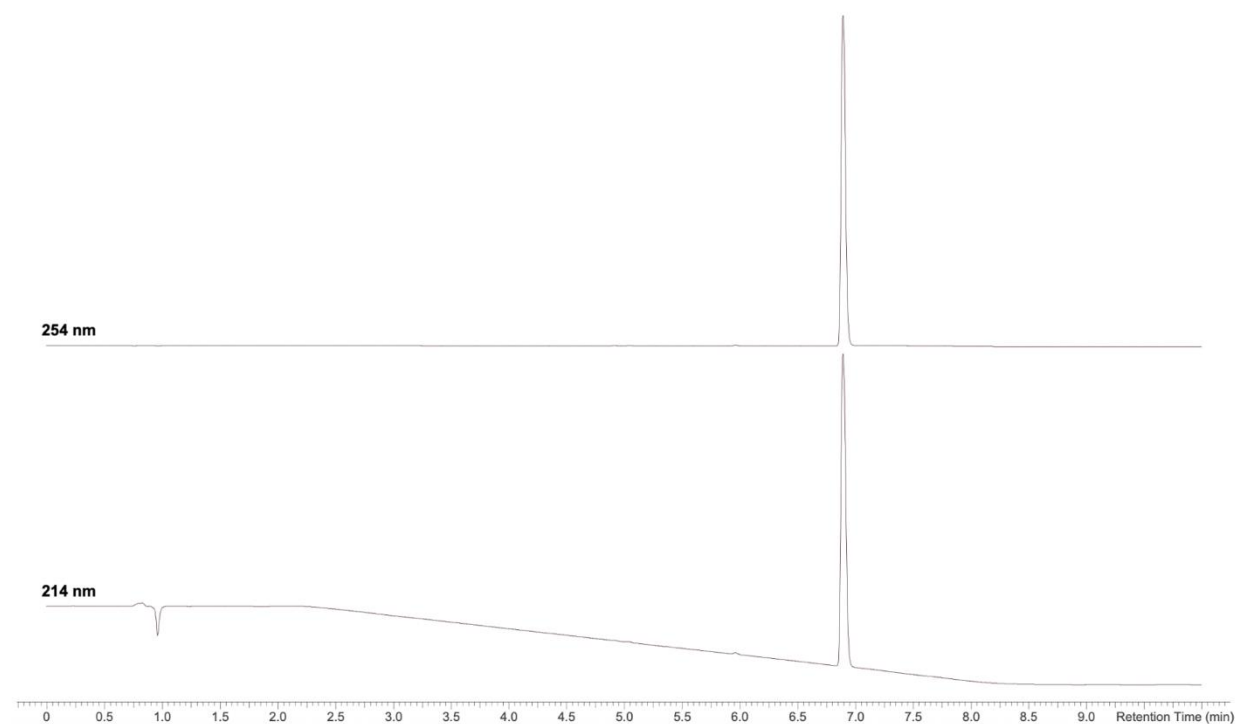

**Figure S4.** RP-HPLC chromatogram of isolated (+)-nemorosone, retention time: 6.9 min. Purity 99.8% (integration of peaks at 214 nm). Eluting conditions: eluent A/eluent B (50/50) during 30 s, followed by gradient elution (A/B from 50/50 to 0/100) over 6 minutes (eluent A: 0.1% HCOOH in water; eluent B: acetonitrile) on a Phenomenex Luna C18 (2), 5  $\mu$ m 250 mm x 4.60 mm column.

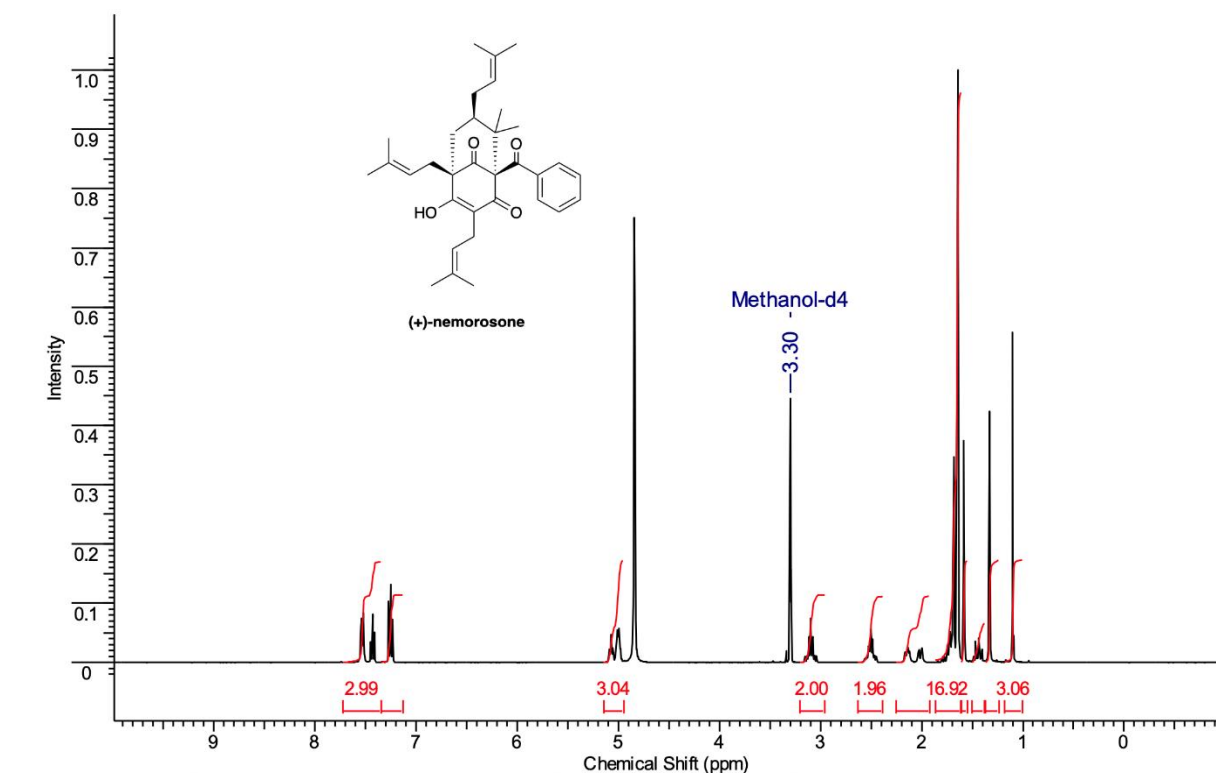

**Figure S5.**  $^1\text{H}$  NMR spectrum of isolated (+)-nemorosone (400MHz,  $\text{CD}_3\text{OD}$ ).

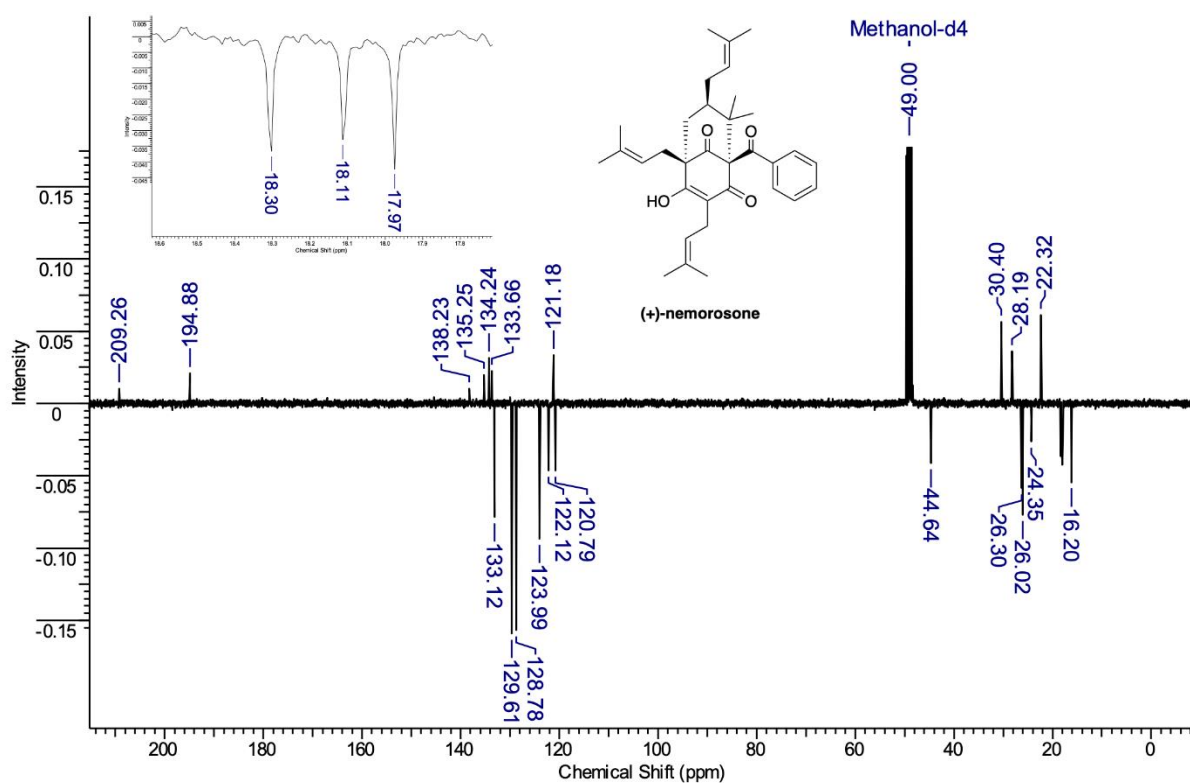

Figure S6.  $^{13}\text{C}$  (APT) NMR spectrum of isolated (+)-nemorosone (100MHz,  $\text{CD}_3\text{OD}$ ).

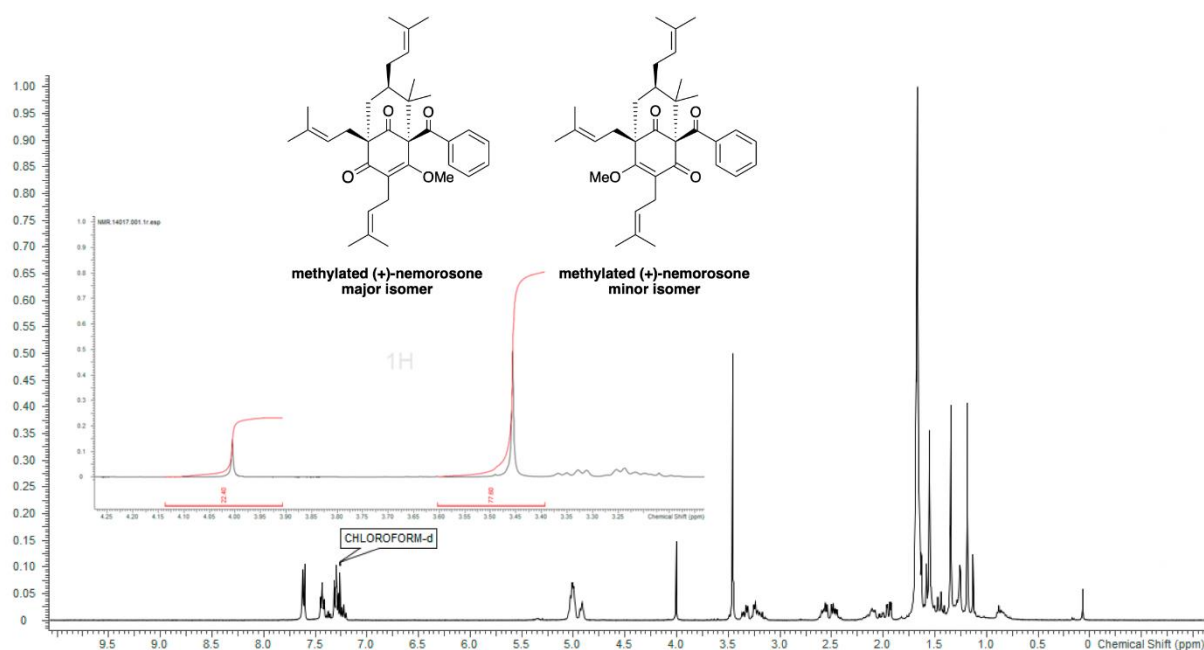

Figure S7.  $^1\text{H}$  NMR spectrum (400MHz,  $\text{CDCl}_3$ ) of the crude mixture obtained after methylation of nemorosone (before chromatographic purification). Inserted detail: integration of diagnostic singlet signals corresponding to the vinylogous methyl ester of both isomers (ratio: 78/22).

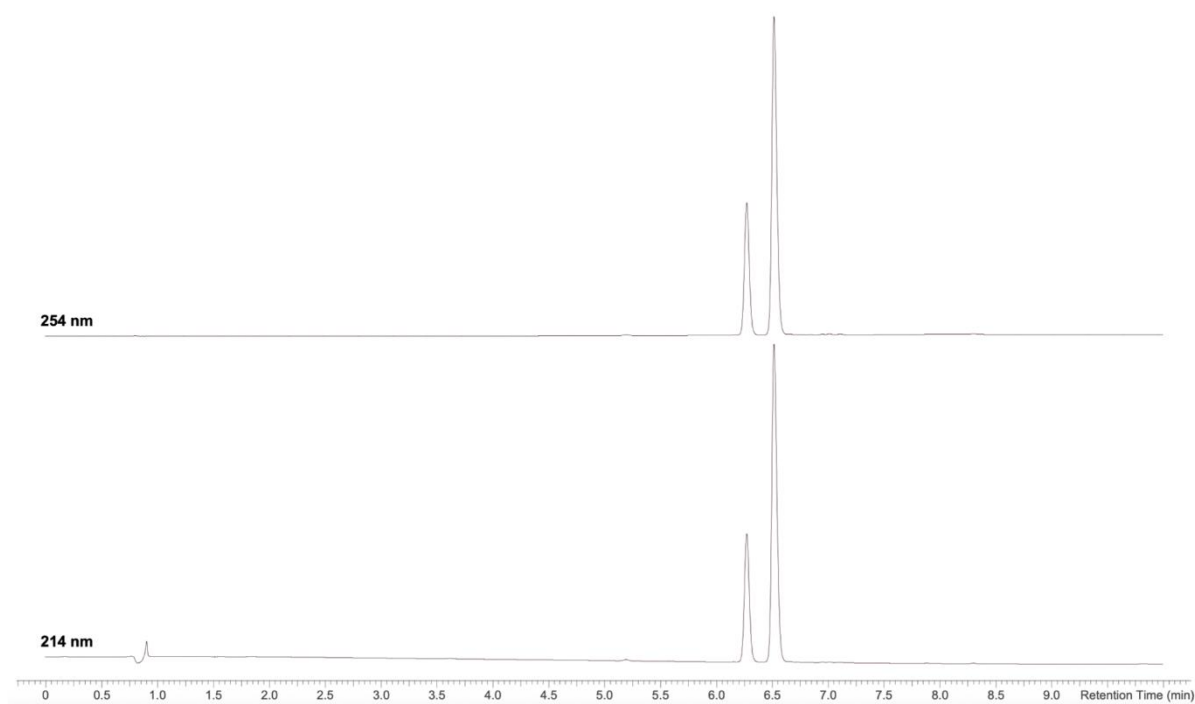

**Figure S8.** RP-HPLC chromatogram of obtained mixture of both *O*-methylated nemorosone isomers after chromatographic purification. Retention times: 6.3 min and 6.5 min (purity 99.3%, ratio: 27.6/72.4, integration of peaks at 214 nm). Eluting conditions: eluent A/eluent B (100/0) during 30 s, followed by gradient elution (A/B from 100/0 to 0/100) over 6 minutes (eluent A: 5 mM NH<sub>4</sub>OAc in water; eluent B: acetonitrile) on a Phenomenex Luna C18 (2), 5  $\mu$ m 250 mm x 4.60 mm column. This mixture was used for biological testing.



**Table S1.** Selected ferroptosis-associated genes differentially expressed in HT1080 cells after exposition to nemorosone (100  $\mu$ M, 8 h), CCCP (50  $\mu$ M, 8 h) and erastin (20  $\mu$ M, 8 h) in relation to the control (untreated cells). LFC: log<sub>2</sub>fold-change, metric indicating how much the expression of a gene changes compared to the control condition; positive values indicate higher expression than the control, while negative values indicate lower expression than the control. When the gene was not differentially expressed by the treatment in question, a dash appears in place of the value. HUGO Gene Nomenclature Committee (HGNC) symbols were used to designate genes. In the case of *SLC7A11* and *ATF3*, the value obtained at 2 h of treatment is shown on the left, and the value obtained at 8 h of treatment is shown on the right.

|                                         | Gen (HGNC)      | LFC (nemorosone) |      | LFC (CCCP) |      | LFC (erastin) |
|-----------------------------------------|-----------------|------------------|------|------------|------|---------------|
| NRF2-mediated oxidative stress response | <i>SQSTM1</i>   | 1.41             |      | 0.46       |      | 0.42          |
|                                         | <i>KEAP1</i>    | -0.57            |      | -          |      | -             |
|                                         | <i>CUL3</i>     | -0.70            |      | -0.39      |      | -             |
|                                         | <i>RBX1</i>     | -0.44            |      | -0.29      |      | -             |
|                                         | <i>EIF2AK3</i>  | 2.68             |      | 1.21       |      | -             |
|                                         | <i>NRF2</i>     | 1.11             |      | 0.69       |      | -             |
|                                         | <i>HMOX1</i>    | 6.55             |      | 4.04       |      | 1.79          |
|                                         | <i>FTH1</i>     | 1.54             |      | 0.53       |      | 0.32          |
|                                         | <i>FTL</i>      | 0.73             |      | 0.38       |      | -             |
|                                         | <i>TFRC</i>     | 0.44             |      | 0.69       |      | -0.29         |
|                                         | <i>NCOA4</i>    | 0.19             |      | -          |      | -             |
|                                         | <i>GCLC</i>     | 1.10             |      | 0.74       |      | -             |
|                                         | <i>GCLM</i>     | 2.00             |      | 1.40       |      | 0.64          |
| p53 signaling                           | <i>CDKN1A</i>   | 0.61             |      | -          |      | -             |
|                                         | <i>TP53</i>     | -                |      | 0.57       |      | -             |
|                                         | <i>SOCS1</i>    | 2.06             |      | -          |      | -             |
|                                         | <i>SLC7A11</i>  | -0.31            | 0.58 | -          | 0.90 | -             |
|                                         | <i>SAT1</i>     | 3.50             |      | 1.74       |      | -             |
|                                         | <i>ATF3</i>     | 3.17             | 4.48 | 3.03       | 2.31 | -             |
|                                         | <i>SERPINE1</i> | 2.24             |      | 1.30       |      | -             |
|                                         | <i>GADD45A</i>  | 3.63             |      | 1.67       |      | -             |
|                                         | <i>GADD45B</i>  | 2.22             |      | 1.01       |      | -             |
|                                         | <i>MDM2</i>     | 0.19             |      | 0.35       |      | -             |
| HSP-mediated response                   | <i>MDM4</i>     | 1.19             |      | -          |      | -             |
|                                         | <i>ATF4</i>     | 0.56             |      | 0.37       |      | -             |
|                                         | <i>HSPA5</i>    | 3.58             |      | 0.44       |      | 0.79          |
|                                         | <i>HSPA6</i>    | 5.93             |      | 3.33       |      | -             |
|                                         | <i>HSPA1A</i>   | 4.52             |      | 2.49       |      | 1.08          |
|                                         | <i>HSPA1B</i>   | 4.28             |      | 1.97       |      | -             |
|                                         | <i>HSP90AA1</i> | 1.28             |      | 0.48       |      | -             |
|                                         | <i>HSP90AB1</i> | 0.54             |      | 0.29       |      | -             |
|                                         | <i>LAMP2</i>    | -                |      | 0.17       |      | -             |
|                                         | <i>HSPA8</i>    | 1.22             |      | -          |      | -             |

|                                  | Gen (HGNC)          | LFC (nemorosone) | LFC (CCCP) | LFC (erastin) |
|----------------------------------|---------------------|------------------|------------|---------------|
| <i>FSP1</i>                      | <i>AIFM2 (FSP1)</i> | 1.16             | 0.52       | -             |
| <b>Unfolded protein response</b> | <i>ERN1 (IRE1α)</i> | 2.69             | 1.78       | -             |
|                                  | <i>ATF6</i>         | 0.27             | 0.68       | -             |
|                                  | <i>DDIT3</i>        | 5.40             | 3.55       | -             |
|                                  | <i>BCL2L11</i>      | -0.38            | -          | -             |
| <b>Apoptosis signaling</b>       | <i>CASP2</i>        | -1.48            | -1.22      | -             |
|                                  | <i>CASP3</i>        | 1.02             | 0.48       | -             |
|                                  | <i>CASP6</i>        | -0.93            | -0.95      | -             |
|                                  | <i>CASP7</i>        | -1.02            | -          | -             |
|                                  | <i>CASP9</i>        | -0.79            | -          | -             |
|                                  | <i>APAF1</i>        | -1.21            | -          | -             |
|                                  | <i>CFLAR</i>        | 1.47             | 0.62       | -             |
|                                  | <i>XIAP</i>         | 0.64             | 0.32       | -             |
|                                  | <i>MCL1</i>         | 0.57             | 0.23       | -0.20         |
|                                  | <i>BCL2L11</i>      | -0.38            | -          | -             |

**Table S2.** p values denoting the significance of enrichment of the differentially expressed pathways after treatment of HT1080 cells with nemorosone (100  $\mu$ M, 8 h), CCCP (50  $\mu$ M, 8 h) and erastin (20  $\mu$ M, 8 h). When the pathway was not differentially expressed by the treatment in question, a dash appears in place of the value.

| Differentially expressed pathway        | p value (nemorosone) | p value (CCCP)      | p value (erastin)  |
|-----------------------------------------|----------------------|---------------------|--------------------|
| Ferroptosis signaling pathway           | $8 \times 10^{-8}$   | $2 \times 10^{-7}$  | $4 \times 10^{-4}$ |
| Autophagy                               | $4 \times 10^{-10}$  | $4 \times 10^{-14}$ | $1 \times 10^{-2}$ |
| Necroptosis signaling pathway           | $1 \times 10^{-2}$   | $3 \times 10^{-3}$  | -                  |
| Apoptosis signaling                     | $6 \times 10^{-5}$   | $4 \times 10^{-3}$  | -                  |
| Endoplasmic reticulum stress pathway    | $6 \times 10^{-9}$   | $4 \times 10^{-4}$  | $4 \times 10^{-4}$ |
| Unfolded protein response               | $1 \times 10^{-12}$  | $5 \times 10^{-9}$  | $4 \times 10^{-8}$ |
| NRF2-mediated oxidative stress response | $3 \times 10^{-8}$   | $4 \times 10^{-10}$ | $4 \times 10^{-3}$ |
| PI3K/AKT signaling                      | $6 \times 10^{-7}$   | $2 \times 10^{-6}$  | $8 \times 10^{-3}$ |
| p53 signaling                           | $2 \times 10^{-11}$  | $8 \times 10^{-9}$  | -                  |
| mTOR signaling                          | $2 \times 10^{-12}$  | $1 \times 10^{-7}$  | -                  |
| HIF1a signaling                         | $9 \times 10^{-5}$   | $2 \times 10^{-8}$  | $2 \times 10^{-4}$ |
| Oxidative phosphorylation               | $4 \times 10^{-2}$   | $3 \times 10^{-5}$  | $3 \times 10^{-3}$ |
